# Supplementary material for: Identifying trigger concepts to screen emergency department visits for diagnostic errors
Source: publisher site journal article supplement (doi:10.1515/dx-2020-0122), 2020-11-13
Supplement: Supplementary file 1 [file j_dx-2020-0122_suppl_001.docx]

| Triggers used in ED settings for quality of care issues and patient safety events | | |
| --- | --- | --- |
|  | Reference | Metric |
| 1. | Al-Mutairi A, et al. Accuracy of the Safer Dx instrument to identify diagnostic errors in primary care. J Gen Intern Med 2016;31(6):602-608. | Unexpected hospitalizations and return visits |
| 2. | Bhise V, et al. An electronic trigger based on care escalation to identify preventable adverse events in hospitalised patients. BMJ Qual Saf 2018;27(3):241-246. | Care escalation (defined as transfer to the intensive care unit (ICU) or initiation of rapid response team (RRT) within 15 days of admission) |
| 3. | Davalos MC, et al. Finding diagnostic errors in children admitted to the PICU. Pediatr Crit Care Med 2017;18(3):265-271. | Patients who were autopsied; Patients seen as outpatients within 2 weeks prior to PICU admission; Patients transferred to PICU unexpectedly from an acute care floor after a rapid response and requiring vasoactive medications |
| 4. | Hudspeth J, et al. Use of an expedited review tool to screen for prior diagnostic error in emergency department patients. Appl Clin Inform 2015;6(4):619-628. | Prior in-system visit during the 14 days preceding their ED visit |
| 5. | Medford-Davis L, et al. Diagnostic errors related to acute abdominal pain in the emergency department. Emerg Med J 2016;33(4):253-259. | (1) Presenting to the ED with abdominal pain, and discharged home and (2) Return ED visits within 10 days that lead to a hospitalization. |
| 6. | Rising KL, et al. Patient returns to the emergency department: the time-to-return curve. Acad Emerg Med 2014;21(8):864-871. | ED discharges were followed forward to identify ED revisits occurring at any hospital within the same state within 30 days. |
| 7. | Shenvi EC, El-Kareh R. Clinical criteria to screen for inpatient diagnostic errors: a scoping review. Diagnosis (Berl) 2015;2(1):3-19.a | A scoping review to collate all individual "trigger" criteria that have been developed or validated that may indicate that an inpatient diagnostic error has occurred. |
| 8. | Singh H, et al. Electronic health record-based surveillance of diagnostic errors in primary care. BMJ Qual Saf 2012;21(2):93-100. | Trigger 1: A primary care index visit followed by unplanned hospitalization within 14 days and Trigger 2: A primary care index visit followed by ≥1 unscheduled visit(s) within 14 days. |
| 9. | Stockwell DC, et al. Development of an electronic pediatric all-cause harm measurement tool using a modified Delphi method. J Patient Saf 2016;12(4):180-189.a | Developed a comprehensive pediatric inpatient all-cause harm measurement tool using a modified Delphi technique. |
| 10. | Unbeck M, et al. Validation of triggers and development of a pediatric trigger tool to identify adverse events. BMC Health Serv Res 2014;14:655.a | Using a broad literature review and expert opinion with a modified Delphi process, a pediatric trigger tool with 88 triggers, definitions, and descriptions including AE preventability decision support was developed and tested |

**Supplemental material, Table 1:** Literature findings to inform trigger list for consensus meeting, conducted January-March 2018.

*aLiterature provided to foster a shared mental model on electronic triggers and diagnostic uncertainty prior to the consensus meeting.*
