# Supplementary material for: Identifying trigger concepts to screen emergency department visits for diagnostic errors
Source: publisher site journal article supplement (doi:10.1515/dx-2020-0122), 2020-11-13
Supplement: Supplementary file 2 [file j_dx-2020-0122_suppl_002.docx]

**Supplementary material, Table 2:** Categorizations of unique triggers identified by survey and/or by literature review and relatedness to diagnostic uncertainty.

| **Source** | **Unique Variable** | **Type** | **Related** |
| --- | --- | --- | --- |
| Survey | 1. Medication errors 2. Poor outcomes | Adverse Events | Potentially related to diagnostic uncertainty |
| Survey, Literature a,b | 1. Transfer to a higher intensity service (ICU)/operating room (*2 hr) (4hr) (<6hr) (8hrs) (within 12 hr) (within 24hr) (within 24 hr of admission) -* ICUs have also been tracking the converse problem of the up-transfer to ICU from the floor within 12 hours. 2. Intubations/critical care procedures (24hr of admission) 3. ICUs have also been tracking the converse problem of the up-transfer to ICU from the floor within 12 hours. | Care Escalation | Potentially related to diagnostic uncertainty |
| Survey | 1. Referrals from other services, patients, M&M cases etc. - Morbidity (these are a potpourri of cases that are given to us from individuals) 2. Morbidity (these are a potpourri of cases that are given to us from individuals) | Case Referrals | Potentially related to diagnostic uncertainty |
| Survey | 1. All codes | Codes | No |
| Survey | 1. ED to inpatient communication | Communication | Potentially related to diagnostic uncertainty |
| Survey | 1. Medical record suspensions 2. Compliance with board certification/MOC 3. Handwashing | Compliance | No |
| Survey, Literatureb | 1. Death in the ED (*Unexpected) -* All Deaths - Any death after admission - Death within 48 hours of admission (*72hr*) - Death within 24 hours of admission - All deaths within 24 hours to the ICU 2. All Deaths 3. Any death after admission 4. Death within 48 hours of admission (72hr) 5. Death within 24 hours of admission 6. all deaths within 24 hours to the ICU 7. Deaths in hospital after ED | Death | Potentially related to diagnostic uncertainty |
| Survey, Literature c* | 1. Delay in care - whether vital signs are obtained within 30 minutes of admission to the floor, or within 30 minutes of discharge for all ESI 3 or less patients 2. Delay in care - whether vital signs are obtained within 30 minutes of admission to the floor, or within 30 minutes of discharge for all ESI 3 or less patients 3. whether vital signs are obtained within 30 minutes of admission to the floor, or within 30 minutes of discharge for all ESI 3 or less patients 4. delays in follow-up of abnormal mammographic results (>60 days for BI-RADS 0, 4, and 5 and > 7 months for BI-RADS 3) 5. Gastroenteritis/dehydration pathway – currently tracking use of the pathway (but done through the use of a pathway order instead of actually tracking what was done 6. Timeliness metrics: antibiotics > 1 hours in neonate or high-risk patient (oncology, sickle cell, transplant) or patient meeting sepsis criteria 7. Sepsis – tracking time to IV fluid start and IV antibiotics started within 60 minutes 8. Median and 90% ile Physician initial assessment times 9. time to offering of pain medication after triage of long bone fractures 10. Febrile neutropenia patients and time to ABX within 1 hour. 11. Asthma pathway – currently tracking use of pathway and initiating an order for RT to give albuterol per pathway when admitted | Delay in Care (General, Disease Specific) | Potentially related to diagnostic uncertainty  No |
| Survey, Literatured | 1. admissions are reviewed for substantial change in diagnosis (we only look for some specific conditions such as abd pain admitted to medicine as gastro, later found to have appendicitis); 2. Missed or misdiagnosis | Diagnosis | Potentially related to diagnostic uncertainty |
| Survey | 1. Child abuse cases 2. Patients who trigger the sepsis alert, but are charted as “not septic” by the provider, but then patient gets the sepsis interventions (usually in a delayed manner) - specific to each provider any positive sepsis huddle and use or not use of the associated order set - tracking time to IV fluid start and IV antibiotics started within 60 minutes - Timeliness metrics: antibiotics > 1 hours in neonate or high-risk patient (oncology, sickle cell, transplant) or patient meeting sepsis criteria 3. Stroke QI Triggers (we are a Comprehensive Stroke Center through JCAHO) 4. We also have specific to each provider any positive sepsis huddle and use or not use of the associated order set. 5. Community acquired pneumonia– tracking correct use of antibiotics. | Disease Specific | Potentially related to diagnostic uncertainty  No |
| Survey | 1. LOS, Admit LOS, LWBS (*admissions and discharges)* 2. Median and 90% ile Length of stay 3. % of patients < 8 hrs LOS for CTAS 1-2 (Canadian Triage Acuity Scores – so these would be trauma/emergent patients) 4. % of patients < 4 hrs LOS for CTAS 3-5 (Urgent, semi-urgent, non-urgent patients) 5. % in the ER 4 hours after call for admission | LOS | No |
| Survey | 1. Medical malpractice claims | Malpractice | Potentially related to diagnostic uncertainty |
| Survey | 1. Patient and family unsolicited concerns 2. Falls 3. Press ganey results – per provider (some might argue not a quality of care metric) | Patient | Potentially related to diagnostic uncertainty  No |
| Survey | 1. All patients where we directed transportation to a local hospital (rather than flying to us) but then patient became a secondary transfer to us later. | Referrals | Potentially related to diagnostic uncertainty |
| Survey, Literature d,e,f, g,h | 1. 72 hour returns with and without admissions (*48 hours) (7 days) (admission or chains of visits defined as more than 3 visits in a 10 day period; for this group we have automatic triggers – admitted to OR/ICU; returned within 12 hours and admitted; discordant diagnoses from first to second visit)* 2. 48 hour returns with admissions 3. Return to ED within 7 days 4. admission or chains of visits defined as more than 3 visits in a 10 day period; for this group we have automatic triggers – admitted to OR/ICU; returned within 12 hours and admitted; discordant diagnoses from first to second visit 5. We have monthly emails specific to each provider (and fellow) for any 48 hour return visit that lead to admission 6. Patient call backs where a problem is identified (this is done by 2 full time RNs: all pediatric patients receive a follow-up phone call) 7. 72 hour returns with sepsis/meningitis | Return Visit (General, Disease Specific) | Potentially related to diagnostic uncertainty |
| Survey | 1. Sedation related incidents | Sedation | No |
| Survey | 1. Serious Events: the ED may initiate the report (and provider) or the ED may be added to a report as one of the services being involved. The reports require review within 72 hours and a written response (all done by ED leadership, either nursing or MD) directed back to the Program for Patient Safety 2. Adverse events (as per our reporting system) – this include drug dosage, wrong drugs, sedation incidents 3. as any “concern” cases that come into our warm line (a line set up specifically for concerns from staff) | Self-Report | Potentially related to diagnostic uncertainty |
| Survey | 1. Positive cultures - Contaminated blood cultures 2. Ultrasounds – each image reviewed by PEM US director 3. Contaminated blood cultures 4. ordering of AXRs for constipation diagnoses 5. Asthma with X-rays - We provide monthly rates compared to their peers. Providers with >20% are encouraged to review their charts. 6. For our Fast Track providers: we provide monthly rates of blood tests, X-rays, and use of antibiotics compared to their peers. Providers with high rates are encouraged to review their ordering behavior. | Testing | Potentially related to diagnostic uncertainty  No |
| Survey | 1. Trauma room videos for QI and use as triggers where there may be diagnostic error due to premature closure to show cases and why / how to help overcome that. 2. All patients with “Trauma STAT now.” 3. Cases where initially a “Trauma STAT” was called but then it was upgraded to a “Trauma STAT Attending” (a higher level of team response) 4. Trauma A 5. Trauma QI Triggers through the American College of Surgery (as required for Level 1 ACS verification) | Trauma | Potentially related to diagnostic uncertainty  No |

a. Bhise V, Sittig DF, Vaghani V, et al. An electronic trigger based on care escalation to identify preventable adverse events in hospitalised patients. BMJ Qual Saf Published Online First: 21 September 2017. doi: 10.1136/bmjqs-2017-006975

b. Davalos, M. C., et al. (2017). "Finding Diagnostic Errors in Children Admitted to the PICU." Pediatr Crit Care Med 18(3): 265-271.

c. Murphy, D. R., et al. (2018). "Electronic Triggers to Identify Delays in Follow-Up of Mammography: Harnessing the Power of Big Data in Health Care." J Am Coll Radiol 15(2): 287-295.

d. Medford-Davis, L., et al. (2016). "Diagnostic errors related to acute abdominal pain in the emergency department." Emerg Med J 33(4): 253-259.

e. Al-Mutairi, A., et al. (2016). "Accuracy of the Safer Dx Instrument to Identify Diagnostic Errors in Primary Care." J Gen Intern Med 31(6): 602-608.

f. Hudspeth, J., El-Kareh, R., & Schiff, G. (2015). “Use of an Expedited Review Tool to Screen for Prior Diagnostic Error in Emergency Department Patients.” Applied Clinical Informatics, 6(4), 619–628.

g. Rising, K. L., et al. (2014). "Patient returns to the emergency department: the time-to-return curve." Acad Emerg Med 21(8): 864-871.

h. Singh H, Giardina TD, Forjuoh SN, et al. “Electronic health record-based surveillance of diagnostic errors in primary care.”

BMJ Qual Saf 2012;21:93-100.

**We included the trigger concept of testing, but not include the manuscript as part of the lit packet because the study was not ED based*
